# Supplementary material for: Photoluminescence properties of europium-activated double layered perovskite Sr3Ti2O7 for high-quality lighting applications
Source: Royal Society of Chemistry journal article supplement (doi:10.1039/d4nj00551a), 2024-01-01
Supplement: d4nj00551a1.pdf [file d4nj00551a1.pdf]

## Supplementary Information

### Photoluminescence Properties of Europium-Activated Double Layered Perovskite $\text{Sr}_3\text{Ti}_2\text{O}_7$ for High-Quality Lighting Applications

Dhananjay Kumar Singh<sup>a,b,\*</sup>, Shriya Sinha<sup>a,c</sup> & Manoj Kumar Mahata<sup>d,\*</sup>

<sup>a</sup>Department of Physics, Indian Institute of Technology (Indian School of Mines), Dhanbad, Jharkhand-826004, India

<sup>b</sup>Department of Physics, Government Polytechnic Siwan, Bihar – 841203, India.

<sup>c</sup>Department of Physics, Shahid Chandrashekhar Azad Govt. P. G. College, Jhabua, Madhya Pradesh – 457661, India

<sup>d</sup>Third Institute of Physics, Georg-August-Universität Göttingen, Friedrich-Hund-Platz 1, Göttingen-37077, Germany

\*Corresponding authors:

DKS [drdksingh.physics@gmail.com](mailto:drdksingh.physics@gmail.com); MKM [mmahata@phys.uni-goettingen.de](mailto:mmahata@phys.uni-goettingen.de)

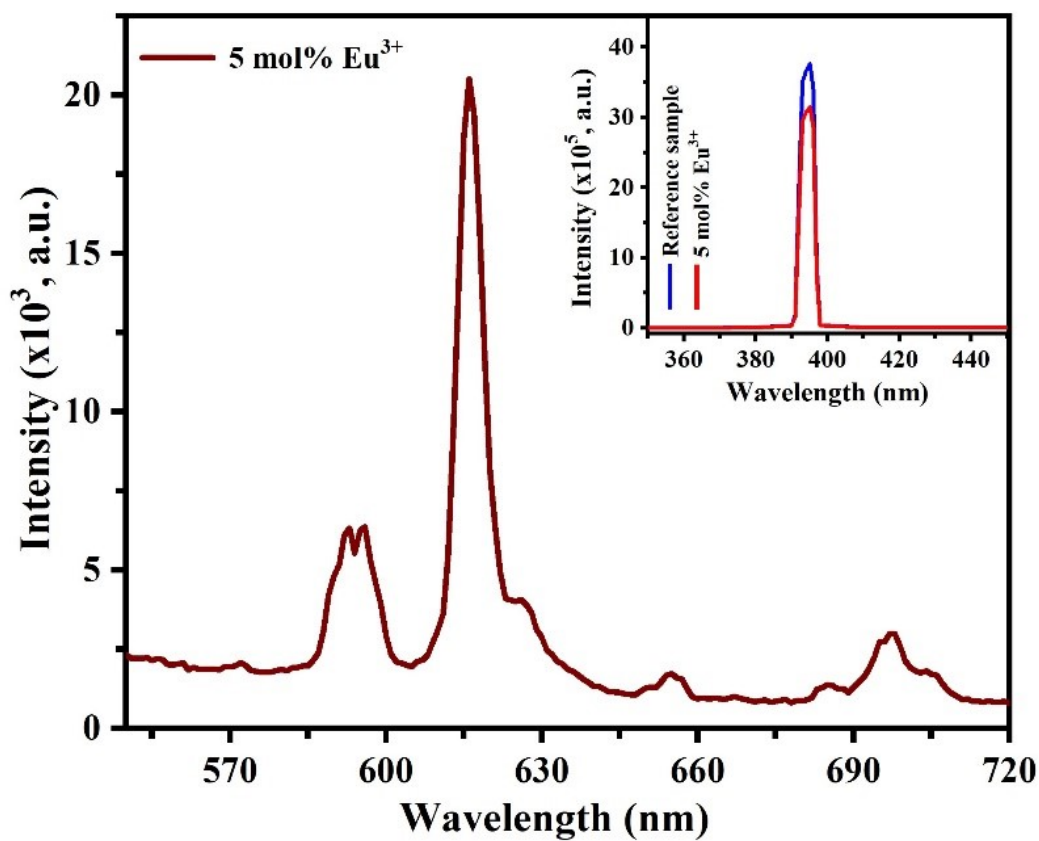

**Figure. S1.** PL emission spectra of 5 mol%  $\text{Eu}^{3+}$  doped  $\text{Sr}_3\text{Ti}_2\text{O}_7$ : phosphor using 395 UV light. Inset of figure shows comparison of reference sample and  $\text{Sr}_3\text{Ti}_2\text{O}_7$ : 5 mol%  $\text{Eu}^{3+}$  sample.

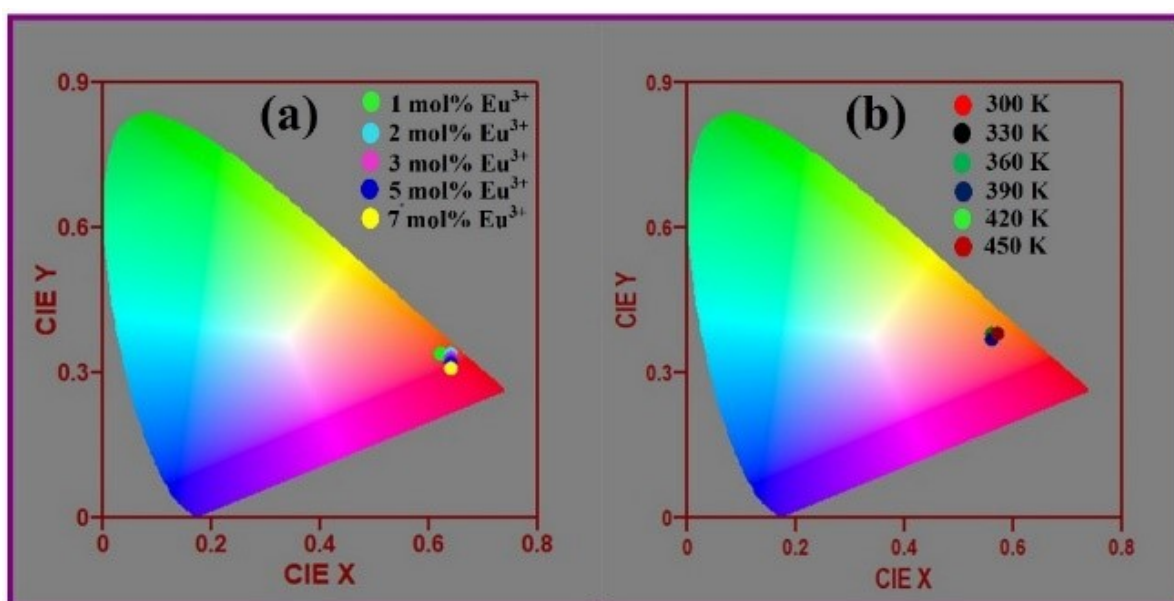

**Figure S2 (a)** CIE chromaticity diagram of  $\text{Sr}_3\text{Ti}_2\text{O}_7$  phosphor doped with various concentration of  $\text{Eu}^{3+}$  **(b)** CIE chromaticity diagram of 5 mol%  $\text{Eu}^{3+}$  doped  $\text{Sr}_3\text{Ti}_2\text{O}_7$  phosphor at different temperatures.
